# Supplementary material for: Overexpression of mutant Ptch in rhabdomyosarcomas is associated with promoter hypomethylation and increased Gli1 and H3K4me3 occupancy
Source: PubMed Central journal article supplement (PMC4496206; doi:10.18632/oncotarget.3272), 2015-03-14
Supplement: oncotarget-06-9113-s001.pdf [file oncotarget-06-9113-s001.pdf]

## SUPPLEMENTARY DATA

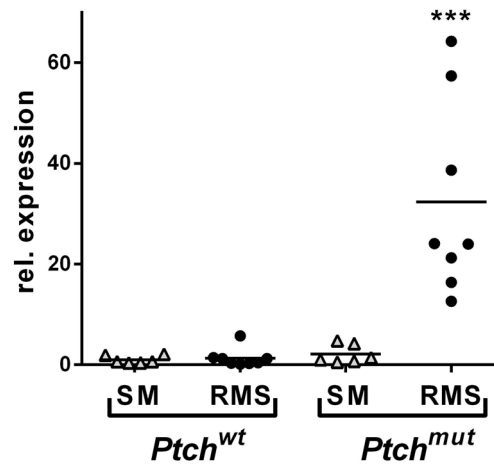

**Supplementary Figure S1: Increased expression of mutant *Ptch* transcripts in RMS of heterozygous *Ptch* mice.** Probe based qPCR was carried out to determine the expression of wildtype (wt) and mutant (mut) *Ptch* transcripts in 6 SM and 8 RMS samples from *Ptch*<sup>+/-</sup> mice. The wt *Ptch* expression in SM was set to 1 and each sample is represented by triangles (SM) and dots (RMS). The mean values are indicated by lines. The differences between wt *Ptch* in SM and RMS as well as mut *Ptch* in SM each compared to mut *Ptch* in RMS are statistically significant (\*\*\*)  $P < 0.001$ .

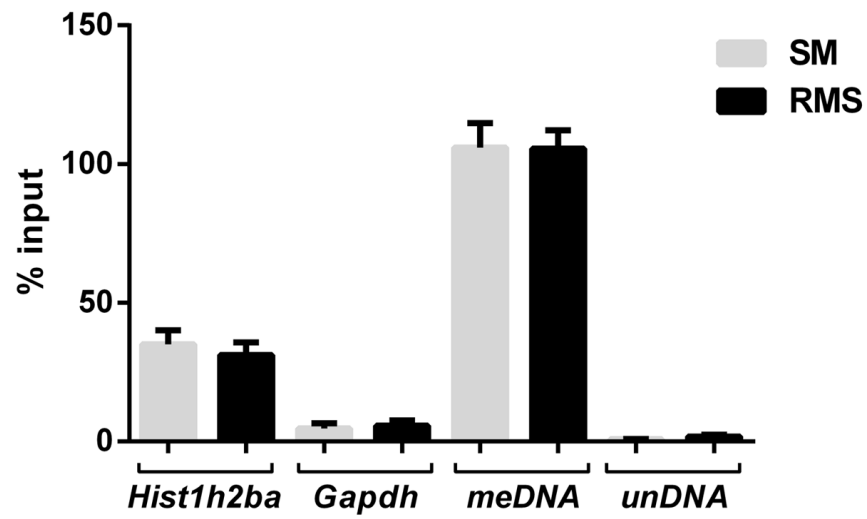

**Supplementary Figure S2: Positive and negative controls for MeDIP with RMS and SM DNA.** Amplification of the *Hist1h2ba* and *Gapdh* genes served as positive and negative controls for methylated and unmethylated DNA samples, respectively, [1, 2] after MeDIP of DNA derived from RMS and SM. Calculation of % input is described in the material and methods sections. Furthermore, methylated (*meDNA*) and unmethylated DNA (*unDNA*) provided by the MagMeDIP kit were added to each sample. After MeDIP the DNA was amplified using oligonucleotides provided by the kit.

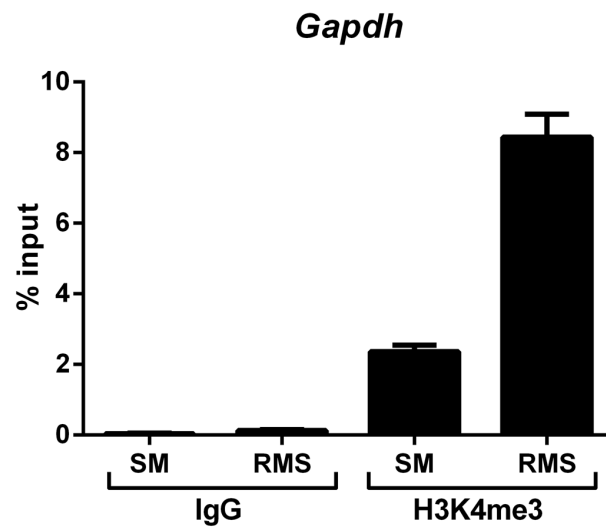

**Supplementary Figure S3: Positive control for H3K4me3 enrichment.** Amplification of the *Gapdh* gene served as a positive control for ChIP with the anti-H3K4me3 antibody in RMS and SM. Data are shown as % input. As a negative control the samples were immunoprecipitated with IgG instead of anti-H3K4me3 antibody.

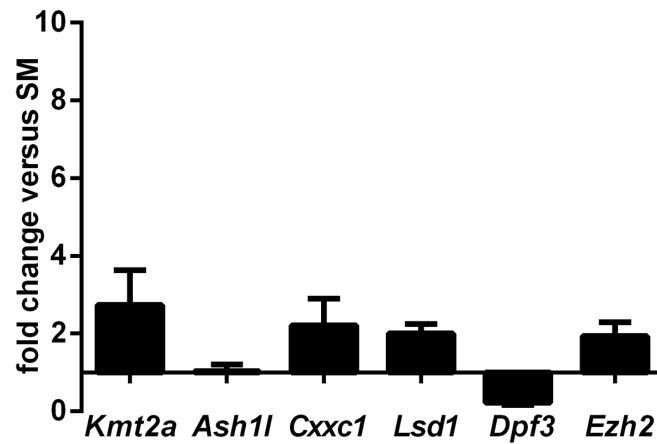

**Supplementary Figure S4: Expression profile of epigenetic modulators in RMS and SM.** qPCR of *Kmt2a* ( $n = 5$ ), *Ash1l* ( $n = 5$ ), *Cxxc1* ( $n = 5$ ), *Kdm1a* (*Lsd1*) ( $n = 4$ ), *Dpf3* ( $n = 4$ ), and *Ezh2* ( $n = 6$ ) of cDNA derived from RMS and SM of heterozygous *Ptch* mice. Shown is the fold expression (mean  $\pm$  SEM) in RMS to the respective control SMs that were set to 1. However, the differences between RMS and SM were not statistically significant.

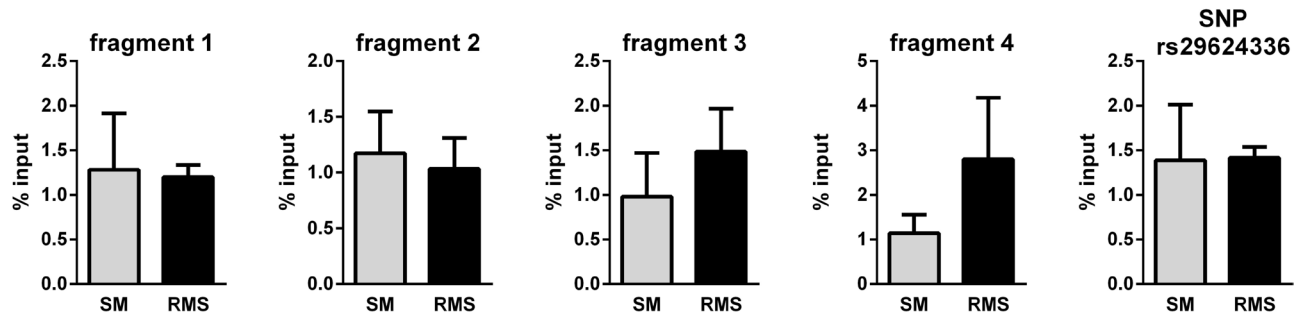

**Supplementary Figure S5: Increased Gli1-binding to the Gli-BS 2 in RMS.** The ChIP enrichment for Gli1 was analyzed in chromatin from RMS (black bars) and SM (grey bars) derived from *5 Pch<sup>+/+</sup>* mice and quantified by qPCR. Mean values and SEM for the amplicons 1, 2, 3, 4 and the amplicon covering SNP rs29624336 are shown. IgG served as a negative control (data not shown). Amplicon 4 covers the Gli-BS 2 (see Fig. 1).

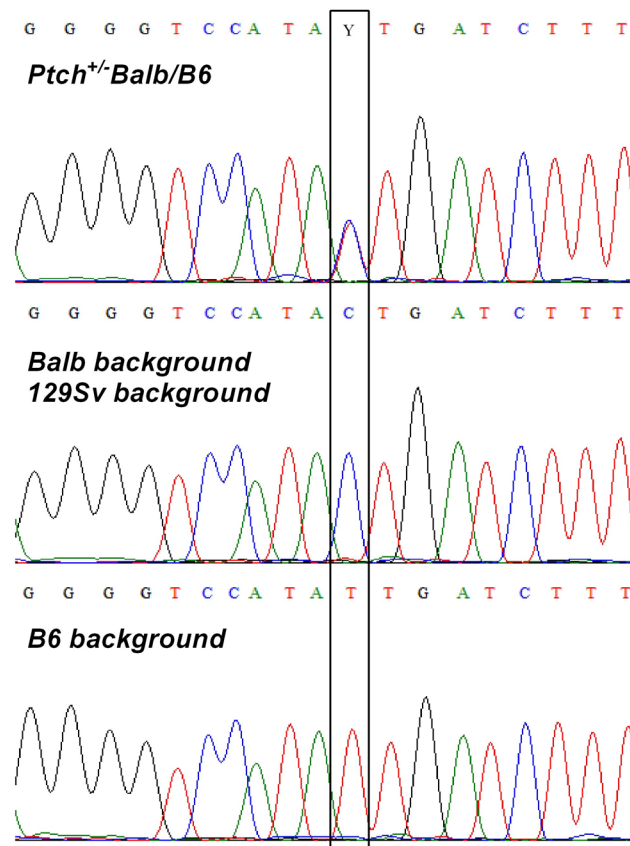

**Supplementary Figure S6: Confirmation of the SNP rs29624336 in *Ptch*<sup>+/-</sup> Balb/B6, Balb/c, 129Sv and C57BL/6 mice.** Genomic DNA of each mouse line was sequenced to confirm the SNP rs29624336 for the respective mouse lines (heterozygous C/T in *Ptch*<sup>+/-</sup> Balb/B6, C in Balb/c and 129 Sv and T in C57BL/6). Representative chromatograms for each variation are shown.

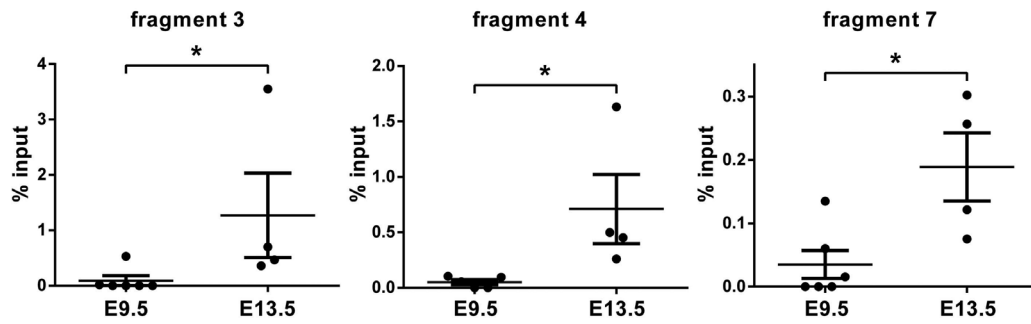

**Supplementary Figure S7: Methylation profile of the *Ptch* promoter at E9.5 and E13.5 during embryogenesis.** DNA derived from tissue samples from wildtype embryos was subjected to MeDIP and analyzed by qPCR. Each dot represents one sample measured in triplicates. For E9.5 each sample consists of 6 embryos. Mean values (lines) and SEM are indicated for each group. The increased methylation in amplicons 3, 4 and 7 at E13.5 is statistically significant ( $*P < 0.05$ ).

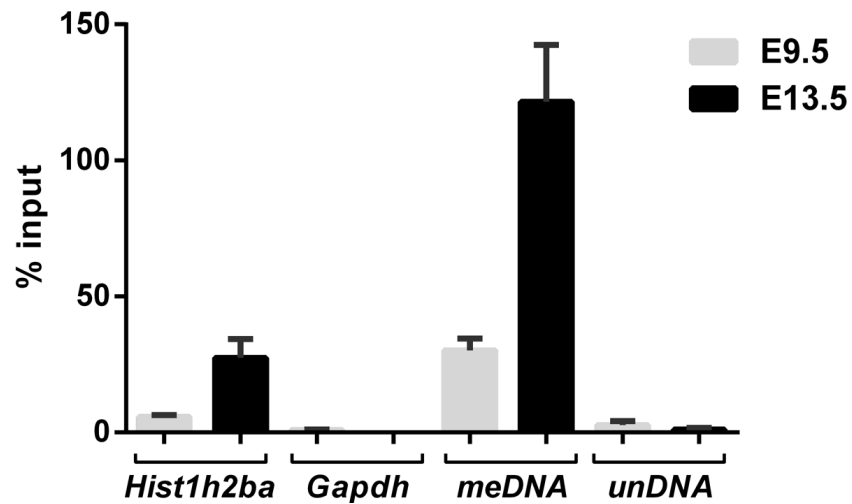

**Supplementary Figure S8: Positive and negative controls for MeDIP with E9.5 and E13.5 DNA.** Amplification of the *Hist1h2ba* and *Gapdh* genes served as positive and negative controls for methylated and unmethylated DNA samples, respectively, after MeDIP of DNA derived from E9.5 and E13.5 old mouse embryos. In addition, we also used methylated (*meDNA*) and unmethylated DNA (*unDNA*) provided by the MagMeDIP kit as positive and negative controls, respectively. As also shown by the MagMeDIP kit manufacturer's manual the % input of the endogenous positive control (here *Hist1h2ba*) and the *meDNA* positive control can vary considerably between different samples.



**Supplementary Table S1. Oligonucleotides used for qPCR, bisulfite NGS and SNP sequencing**

| Name            | Sequence (5'-3' orientation)    | Location           | Application                                     |
|-----------------|---------------------------------|--------------------|-------------------------------------------------|
| Ptch-F Wt TQ    | TGCAAACCATGTTCCAGTTA            | exon 8             | <i>Wt Ptch</i> expression                       |
| Ptch-R1 Wt TQ   | TTGGGGCGACACTTTGAT              | exon 9             |                                                 |
| Ptch Wt Sonde   | FAM-ACCACCTCCACGTAAGTCCTCT-BHQ1 | exon8/9            |                                                 |
| Ptch-F d8/9 TQ  | CGTCAAGAATGCCACTGG              | exon 7             | <i>Ptch<sup>d8/9</sup></i> expression           |
| Ptch-R d8/9 TQ  | AAACCTGAGTTGTCGCAG              | exon 10/11         |                                                 |
| Ptch d8/9 Sonde | FAM-AACTTGTCAGCTTGCCTATGCC-BHQ1 | exon 7/10          |                                                 |
| PtcPrFra3-F_Neu | AGCCATTGGCTGGCAGCTGA            | -2601 to           | MedIP Fragment 1                                |
| PtcPrFra3-R_Neu | ACGTGACCTGGACCGAGAG             | -2304 <sup>1</sup> | <i>Ptch</i> promoter                            |
| PtchProFra4-Af1 | GGTTTGGGATTGAGGATGGCAAG         | -2827 to           | MedIP Fragment 2                                |
| PtcPrFr4-Ar1NEU | GACACGCCGTAGTACATTCCTGA         | -2576 <sup>1</sup> | <i>Ptch</i> promoter                            |
| PtchProFra5-If2 | AGCAGACCACAGGGGAAG              | -3665 to           | MedIP Fragment 3                                |
| PtchProFra5-Ir2 | GCCCAGCTATGCAAAGCCTCT           | -3399 <sup>1</sup> | <i>Ptch</i> promoter                            |
| Frag6-F2        | TGCAGTTAGCTGGAAGTTAACA          | -3958 to           | MedIP Fragment 4                                |
| Frag6-R1        | CTTTGGGGATCTAATTGGCCT           | -3686 <sup>1</sup> | <i>Ptch</i> promoter                            |
| mPtch-Me-F      | CTCGCTTGTAGCTCGCACGC            | -7445 to           | MedIP Fragment 5                                |
| mPtch-Me-R2     | GTTGCGTTCAGCCAGGTGTCT           | -7055 <sup>1</sup> | <i>Ptch</i> promoter                            |
| mPtch_Ex1a-F    | ATTGATGTGAACCTCACGGTC           | -7645 to           | MedIP Fragment 6                                |
| mPtch-Me-R      | GCGTGCGAGCTACAAGCGAG            | -7426 <sup>1</sup> | <i>Ptch</i> promoter                            |
| PtchPr2-F       | GAGCTGGGGAAGAGTAAGGT            | -8385 to           | MedIP Fragment 7                                |
| PtchPr4-R       | CCTCTCAGAGTAGCTGCCTT            | -8217 <sup>1</sup> | <i>Ptch</i> promoter                            |
| mTsh2b_MeDIP-F  | TCTCCTTGCGGCATCTCTTAC           | exon 1             | <i>Hist1h2ba</i> gene as                        |
| mTsh2b_MeDIP-R  | GGCGGTAAAGGGTGCTACTAT           | exon 1             | MedIP positive control                          |
| GapDH-ChIP2-F   | GGGTTCTATAAATACGGACTGC          | exon 1             | <i>Gapdh</i> gene as                            |
| GapDH-ChIP2-R   | CTGGCACTGCACAAGAAG              | exon 1             | MedIP positive control<br>ChIP negative control |
| BiZe Df1        | GGGGTTTTGGGTAGGTAGG             | 25 to              | Bisulfite NGS                                   |
| BiZe Dr1        | ATACACCTTAAAAATCTACTCCAAAAC     | 165 <sup>1</sup>   | CpG Island A                                    |
| BiZe Bf1        | TTTATTTATTGAGTTAAGGAGTTGTTG     | -689 to            | Bisulfite NGS                                   |
| BiZe Cr1        | CCCAAATCCCCCCTAAAC              | -278 <sup>1</sup>  | CpG Island A                                    |
| Fra3-BSP-F2     | ATGAAAAAAGTAGATTATAGGGGAA       | -3673 to           | Bisulfite NGS                                   |
| Fra3-BSP-R2     | CTTTAACCCAACTATACAAAACC         | -3394 <sup>1</sup> | Frag. 3 <i>Ptch</i> promoter                    |
| Fra4-BSP-F2     | GTAGTTAGTTGGAAGTTAATAAATT       | -3957 to           | Bisulfite NGS                                   |
| Fra4-BSP-R1     | CTACCCCAATTTACCTCATTACT         | -3784 <sup>1</sup> | Frag. 4 <i>Ptch</i> promoter                    |
| Fra5-BSP-F1     | GTYGTTTGGGATTTTATTTGTA          | -7332 to           | Bisulfite NGS                                   |
| Fra5-BSP-R1     | ACRCATCTCTCCAATCTAAATA          | -7034 <sup>1</sup> | Frag. 5 <i>Ptch</i> promoter                    |

(Continued)

| Name            | Sequence (5'-3' orientation) | Location           | Application                                   |
|-----------------|------------------------------|--------------------|-----------------------------------------------|
| Fra6-BSP-F1     | GAGAGATAGGGAGAAGAGAGAGTT     | -7713 to           | Bisulfite NGS                                 |
| Fra6-BSP-R3     | ACAAATAAAATCCCAAACRAC        | -7312 <sup>1</sup> | Frag. 6 <i>Ptch</i> promoter                  |
| Fra7-BSP-F1     | AGGTGTTGTTTTTTGGAAGTTT       | -8369 to           | Bisulfite NGS                                 |
| Fra7-BSP-R2     | TAAATAAACAAACTACCCTCCCA      | -8074 <sup>1</sup> | Frag. 7 <i>Ptch</i> promoter                  |
| SNPrs29624336-F | AGTGGGACAATGTAGCGAAG         | -5444 to           | <i>Gli1</i> ChIP and<br><i>SNP</i> sequencing |
| SNPrs29624336-R | CCTGAGTCAATCTCTGCAGGT        | -5248 <sup>1</sup> |                                               |
| Dnmt1.forw      | CACCTAGACGACCCTAACCTG        | exon 15            | <i>Dnmt1</i> expression                       |
| Dnmt1.rev       | AGGTGGAGTCGTAGATGGACA        | exon 16            |                                               |
| Dnmt2.F2        | TGCACATGTGGTGGCTGCTAT        | exon 2             | <i>Trdmt1</i> expression                      |
| Dnmt2.R         | CTAGTTGTCCTTGGATCGGTC        | exon 4             |                                               |
| Dnmt3a.forw     | CATTGATGAGCGCACAAGGGAGC      | exon 11/12         | <i>Dnmt3a</i> expression <sup>2</sup>         |
| Dnmt3a.rev      | GGTGCTCCAGGGTGACATTGAG       | exon 13            |                                               |
| Dnmt3b.F        | GGTGATGGCAAGTTTTCTGAGAT      | exon 8/9           | <i>Dnmt3b</i> expression <sup>3</sup>         |
| Dnmt3b.R        | ACTCCAGCATGGGCTTCAGCT        | exon 10            |                                               |
| Hdac1.F         | CTGTTACTACTACGACGGGGA        | exon 1/2           | <i>Hdac1</i> expression                       |
| Hdac1.R         | TGTGAGGACGGTAGATCTCCA        | exon 2/3           |                                               |
| Hdac2.F         | GTGTGCTACTACTATGATGGTG       | exon 1/2           | <i>Hdac2</i> expression                       |
| Hdac2.R         | AGCAGTGGCTTTATGAGGCCT        | exon 3             |                                               |
| Hdac3.F         | AGTGTCCAGATTCATGATGTCC       | exon 14            | <i>Hdac3</i> expression                       |
| Hdac3.R         | TCCTTGTCGTTGTCATGGTCG        | exon 15            |                                               |
| Hdac4.F2        | GTCAACATGAGCAGTTGTCCC        | exon 3             | <i>Hdac4</i> expression <sup>4</sup>          |
| Hdac4.R2        | CAAACCTCTGCAGCTTCATCTT       | exon 5             |                                               |
| Hdac5.F         | AACAGAGCACGCTCATAGCAG        | exon 11            | <i>Hdac5</i> expression <sup>5</sup>          |
| Hdac5.R         | CTGCATGACCAGCTGCTGCA         | exon 12            |                                               |
| Hdac6.F         | GTA CT TCCCATCGCCTATGAG      | exon 22            | <i>Hdac6</i> expression <sup>6</sup>          |
| Hdac6.R         | GATAGATGCCAAATTGTATCCAC      | exon 24            |                                               |
| Hdac7.F2        | AACCCAGTCTTCCCCAGCAG         | exon 11            | <i>Hdac7</i> expression <sup>7</sup>          |
| Hdac7.R2        | AGGAGCACGTGCCGTTTCCAGA       | exon 13            |                                               |
| Hdac8.F         | GACTATGCAGCAGCTATAGGAG       | exon 4             | <i>Hdac8</i> expression <sup>8</sup>          |
| Hdac8.R         | TGTAGATCCAAATCCACGTAGAG      | exon 5             |                                               |
| Hdac9.F         | ATCGAACCCAGTCTGCACCTT        | exon 9             | <i>Hdac9</i> expression <sup>9</sup>          |
| Hdac9.R         | TGTCTTCCATGGATTGGTCCC        | exon 10            |                                               |
| Hdac10.F        | AGAAATATGGGCTGCAGAGGAT       | exon 5/6           | <i>Hdac10</i> expression <sup>10</sup>        |
| Hdac10.R        | GGCATT TCCCATCCCAACCTG       | exon 7/8           |                                               |
| Hdac11.F        | ATGGCATGCTGGTGGAGGCT         | exon 3             | <i>Hdac11</i> expression                      |
| Hdac11.R        | TCGCTCCACAGCCAGCTTCC         | exon 5             |                                               |
| Lsd1F.1         | AGATGAGCAGATTGAACATTGGA      | exon 10            | <i>Kdm1a</i> expression <sup>11</sup>         |
| Lsd1.R2         | GGAACCTCGGCTGTGATATCTCTG     | exon 11            |                                               |

(Continued)

| Name     | Sequence (5'-3' orientation) | Location  | Application                           |
|----------|------------------------------|-----------|---------------------------------------|
| Dpf3-F2  | CGCCTCTCAGGAAGACCACGAC       | exon 6    | <i>Dpf3</i> expression <sup>12</sup>  |
| Dpf3-R2  | GCGTAGTGGTAGCTGAGTCCTG       | exon 7    |                                       |
| Ezh2-F2  | GAGGTTTCAGAAGAGCTGATGA       | exon 2    | <i>Ezh2</i> expression <sup>13</sup>  |
| Ezh2-R2  | TAACGGGATGACTTGTGCTGG        | exon 4    |                                       |
| mCxx1-F2 | GCATGAAGCTGGCAGCCAACC        | exon 9/10 | <i>Cxxc1</i> expression               |
| mCxx1-R2 | CGCAGAAGATCTGCAGATCTG        | exon 11   |                                       |
| mMll1-F2 | ATGACATAAAGGCTGAGCTGG        | exon 2    | <i>Kmt2a</i> expression <sup>14</sup> |
| mMll1-R  | TCAGAGCCACTTCTAGGTCTC        | exon 4    |                                       |
| Ash11-F1 | CCAGAGGATACAGAGGCATGA        | exon 10   | <i>Ash11</i> expression               |
| Ash11-R1 | TGTCCCAGCTGGCATATCCTT        | exon 12   |                                       |

<sup>1</sup>The position refers to the first ATG in *Ptch* exon 1b as +1

<sup>2</sup>*Dnmt3a*: the location of primers is according to ensembl transcript ENSMUST00000020991

<sup>3</sup>*Dnmt3b*: the location of primers is according to ensembl transcript ENSMUST00000109774

<sup>4</sup>*Hdac3*: the location of primers is according to ensembl transcript ENSMUST00000043498

<sup>5</sup>*Hdac5*: the location of primers is according to ensembl transcript ENSMUST00000107152

<sup>6</sup>*Hdac6*: the location of primers is according to ensembl transcript ENSMUST00000115642

<sup>7</sup>*Hdac7*: the location of primers is according to ensembl transcript ENSMUST00000116408

<sup>8</sup>*Hdac8*: the location of primers is according to ensembl transcript ENSMUST00000113616

<sup>9</sup>*Hdac9*: the location of primers is according to ensembl transcript ENSMUST00000073838

<sup>10</sup>*Hdac10*: the location of primers is according to ensembl transcript ENSMUST00000109347

<sup>11</sup>*Kdm1a*: the location of primers is according to ensembl transcript ENSMUST00000116273

<sup>12</sup>*Dpf3*: the location of primers is according to ensembl transcript ENSMUST00000178756

<sup>13</sup>*Ezh2*: the location of primers is according to ensembl transcript ENSMUST 00000081721

<sup>14</sup>*Kmt2a*: the location of primers is according to ensembl transcript ENSMUST00000128768

**Supplementary Table S2. Buffers and solutions for ChIP**

| Buffer/solution & application                                   | Ingredients                                                                                                                                                  |
|-----------------------------------------------------------------|--------------------------------------------------------------------------------------------------------------------------------------------------------------|
| Crosslinking solution for crosslinking and subsequent quenching | 0.5% formaldehyde/PBS 156 mM glycine (added for quenching)                                                                                                   |
| Homogenization buffer                                           | 150 mM NaCl<br>20 mM EDTA (pH 8)<br>50 mM Tris (pH 7.5)<br>0.5% NP-40<br>1% Triton X-100<br>20 mM NaF<br>Complete Protease Inhibitor (Roche, Basel, Schweiz) |
| Douncing buffer (samples dounced with pestle A)                 | 50 mM Tris (pH 8)<br>10 mM EDTA (pH 8)<br>1% SDS<br>Complete Protease Inhibitor (Roche)                                                                      |
| Preclearing buffer                                              | 50% Sepharose (w/v) (GE Healthcare) in IP buffer (see below)                                                                                                 |
| IP buffer                                                       | 150 mM NaCl<br>20 mM EDTA (pH 8)<br>50 mM Tris (pH 8)<br>1% NP-40<br>20 mM NaF<br>0.5% SDS<br>Complete Protease Inhibitor (Roche)                            |
| Protein A buffer                                                | 50% (w/v) Protein A Sepharose (GE Healthcare) in IP buffer                                                                                                   |
| Wash buffer                                                     | 100 mM Tris (pH 8.5)<br>500 mM LiCl<br>1% NP-40<br>1% SDS<br>20 mM EDTA (pH 8)<br>20 mM NaF                                                                  |
| TE                                                              | 10 mM Tris (pH 8)<br>1 mM EDTA (pH 8)                                                                                                                        |

**Supplementary Table S3. Antibodies used for ChIP and Western blot**

| <i>antibodies for ChIP</i>                                                     | <i>concentration</i> |
|--------------------------------------------------------------------------------|----------------------|
| pAb rabbit anti Histone H3 (tri methyl K4) ab8580 Abcam (Cambridge, UK)        | 1 µg/ml              |
| pAb rabbit control IgG ab46540 and ab 37415 Abcam                              | 1 µg/ml              |
| pAb rabbit anti Gli1 NB600-600 Novus Biologicals (USA)                         | 1 µg/ml              |
| <i>primary antibodies for Western Blot</i>                                     | <i>dilution</i>      |
| pAb rabbit anti Hdac1 #2062 Cell Signaling Technology (Cambridge, UK)          | 1:1000               |
| mAb mouse anti Hspa8 (HSC70) sc-7298 Santa Cruz (Dallas, Texas, USA)           | 1:10000              |
| <i>secondary antibodies for Western Blot</i>                                   |                      |
| pAb sheep anti mouse/HRP <sup>1</sup> NA931 GE Healthcare                      | 1:10000              |
| pAb goat anti rabbit/HRP <sup>1</sup> 111-035-045 Jackson ImmunoResearch (USA) | 1:5000               |

<sup>1</sup>signals were visualized using the ECL plus detection system (GE Healthcare).

Abbreviations: HRP, horseradish peroxidase; mAb, monoclonal antibody; pAb, polyclonal antibody

## REFERENCES

1. Singal R, vanWert J, Bashambu M, Wolfe SA, Wilkerson DC, Grimes SR. Testis-specific histone H1t gene is hypermethylated in nongerminal cells in the mouse. *Biology of reproduction*. 2000; 63:1237–1244.
2. Liu Y, Quang P, Braggio E, Ngo H, Badalian-Very G, Flores L, Zhang Y, Sacco A, Maiso P, Azab AK, Azab F, Carrasco R, Rollins BJ, et al. Novel tumor suppressor function of glucocorticoid-induced TNF receptor GITR in multiple myeloma. *PloS one*. 2013; 8:e66982.
